# Supplementary material
Source: Springer Nature journal article supplement (https://www.springermedizin.de/resource/supplementary/13075_2012_3620_MOESM3_ESM.pdf/9694946)

A

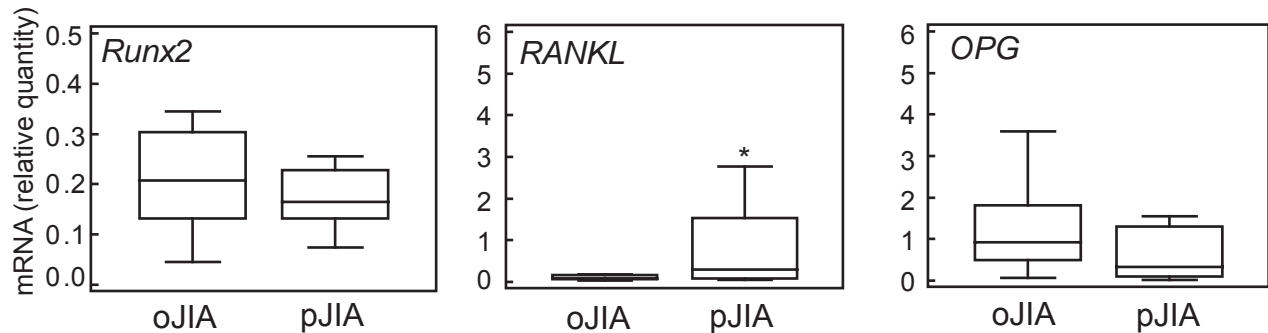

B

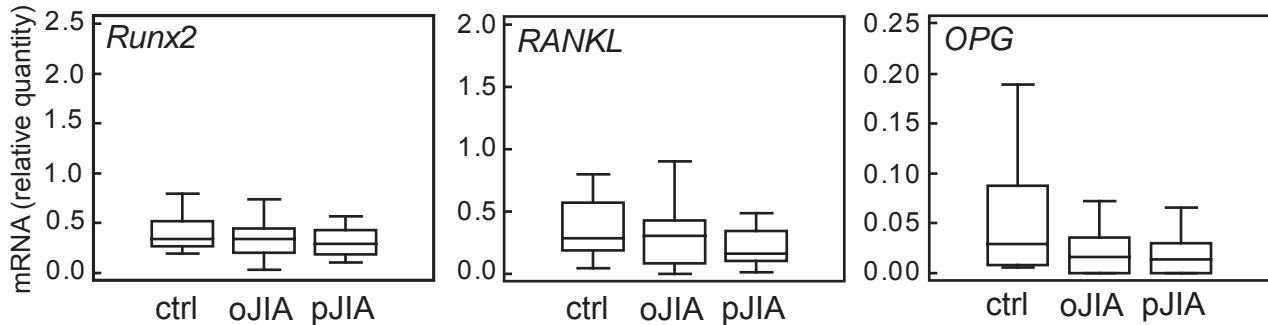

Supplement: MOESM3 [file 9694946]
